# Supplementary material for: Direct inference and control of genetic population structure from RNA sequencing data
Source: PubMed Central journal article supplement (PMC10397182; doi:10.1038/s42003-023-05171-9), 2023-08-02
Supplement: 42003_2023_5171_MOESM3_ESM.pdf [file 42003_2023_5171_MOESM3_ESM.pdf]

## Description of Additional Supplementary Files

**File Name:** Supplementary Data 1

**Description:** Source data for Figures 2, 4a, and 5
